# Supplementary material for: Catalytic performance of the high and low temperature polymorphs of (C6N2H16)0.5[(VO)(HAsO4)F]: structural, thermal, spectroscopic and magnetic studies
Source: Royal Society of Chemistry journal article supplement (doi:10.1039/b910553k), 2009-11-12
Supplement: b910553k.pdf [file b910553k.pdf]

## Supplementary Material

| ATOMS | x          | y          | z          | U(eq) | Ocupac. F |
|-------|------------|------------|------------|-------|-----------|
| As    | 0.1916 (1) | 0.1877(1)  | 0.2305(1)  | 15(1) | 1         |
| V     | 0.1806(1)  | 0.1848(1)  | 0.5335(1)  | 16(1) | 1         |
| F     | 0.2820(2)  | 0.1015(5)  | 0.5358(4)  | 21(1) | 1         |
| O(1)  | 0.1596(2)  | 0.0920(8)  | 0.3451(4)  | 20(1) | 1         |
| O(2)  | 0.1528(2)  | 0.3951(6)  | 0.1865(5)  | 25(1) | 1         |
| O(3)  | 0.1727(2)  | 0.0720(7)  | 0.0889(4)  | 20(1) | 1         |
| O(4)  | 0.2725(2)  | 0.2240(6)  | 0.2811(4)  | 21(1) | 1         |
| O(5)  | 0.1112(2)  | 0.2650(8)  | 0.5409(5)  | 26(1) | 1         |
| N(1)  | 0.1167(3)  | 0.2913(10) | -0.1463(7) | 30(1) | 1         |
| C(1)  | 0.0478(3)  | 0.2891(11) | -0.1201(8) | 30(1) | 1         |
| C(2)  | 0.0114(4)  | 0.1156(11) | -0.1724(9) | 33(1) | 1         |
| C(3)  | 0.0116(4)  | 0.4596(11) | -0.1764(8) | 35(1) | 1         |
| H(1)  | 0.1672     | 0.4433     | 0.1283     | 38    | 1         |
| H(1A) | 0.1134     | 0.2752     | -0.2325    | 45    | 1         |
| H(1B) | 0.1407     | 0.2011     | -0.1006    | 45    | 1         |
| H(1C) | 0.1358     | 0.3989     | -0.1208    | 45    | 1         |
| H(1)  | 0.0532     | 0.2915     | -0.0327    | 36    | 1         |
| H(2A) | -0.0266    | 0.1037     | -0.1360    | 40    | 1         |
| H(2B) | 0.0396     | 0.0104     | -0.1433    | 40    | 1         |
| H(3A) | -0.0260    | 0.4741     | -0.1389    | 42    | 1         |
| H(3B) | 0.0400     | 0.5649     | -0.1492    | 42    | 1         |

**Table S1.** Fractional atomic coordinates and equivalent isotropic displacement parameters ( $\text{\AA}^2 \times 10^3$ ) for **1**.

| ATOMS | x          | y         | z          | U(eq) | Ocupac. F |
|-------|------------|-----------|------------|-------|-----------|
| As    | 0.1958 (1) | 0.1878(1) | 0.2199(1)  | 13(1) | 1         |
| V     | 0.1842(1)  | 0.1839(1) | 0.5201(1)  | 12(1) | 1         |
| F     | 0.2808(1)  | 0.1037(3) | 0.5410(2)  | 18(1) | 1         |
| O(1)  | 0.1656(1)  | 0.0912(4) | 0.3283(2)  | 18(1) | 1         |
| O(2)  | 0.1593(1)  | 0.3927(4) | 0.1646(3)  | 21(1) | 1         |
| O(3)  | 0.1787(1)  | 0.0714(4) | 0.0744(3)  | 18(1) | 1         |
| O(4)  | 0.2717(1)  | 0.2252(4) | 0.2851(3)  | 19(1) | 1         |
| O(5)  | 0.1183(1)  | 0.2580(4) | 0.5157(3)  | 25(1) | 1         |
| N(1)  | 0.1317(1)  | 0.3021(5) | -0.1583(4) | 24(1) | 1         |
| C(1)  | 0.0646(2)  | 0.3025(7) | -0.1773(6) | 42(1) | 1         |
| C(2)  | 0.0344(2)  | 0.1241(8) | -0.2422(8) | 73(1) | 1         |
| C(3)  | 0.0343(2)  | 0.4709(8) | -0.2472(7) | 62(1) | 1         |
| H(1)  | 0.1733     | 0.4391    | 0.1089     | 31    | 1         |
| H(1A) | 0.1370     | 0.2823    | -0.2386    | 37    | 1         |
| H(1B) | 0.1501     | 0.2141    | -0.0999    | 37    | 1         |
| H(1C) | 0.1479     | 0.4096    | -0.1252    | 37    | 1         |
| H(1)  | 0.0612     | 0.3050    | -0.0853    | 63    | 1         |
| H(2A) | -0.0543    | 0.0302    | -0.1871    | 109   | 1         |
| H(2B) | 0.0390     | 0.1218    | -0.3317    | 109   | 1         |
| H(3A) | 0.0364     | 0.4754    | -0.3393    | 92    | 1         |
| H(3B) | 0.0552     | 0.5775    | -0.1978    | 92    | 1         |

**Table S2.** Fractional atomic coordinates and equivalent isotropic displacement parameters ( $\text{\AA}^2 \times 10^3$ ) for **2**.

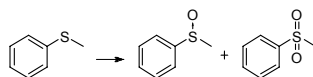

| Conditions                                                  | Catalyst | Conv. (%) (h.) | Select. (%) <sup>a</sup> |
|-------------------------------------------------------------|----------|----------------|--------------------------|
| 1% cat., r.t., H <sub>2</sub> O <sub>2</sub> (2.5 mmol)     | Phase 1  | 100 (4.5)      | 18                       |
| 1% cat., r.t., H <sub>2</sub> O <sub>2</sub> (1.1 + 1 mmol) | Phase 1  | 90 (2)         | 90                       |
| 1% cat., r.t., H <sub>2</sub> O <sub>2</sub> (2.5 mmol)     | Phase 2  | 90 (6)         | 0                        |

<sup>a</sup>Blank tests achieved conversions lower than 3 per cent with H<sub>2</sub>O<sub>2</sub>.<sup>a</sup>Selectivity referred to the sulfoxides.

**Table S3.** Oxidation of methylphenyl sulphide by phases **1** and **2**.\*

| Conditions | Time (h) | Conv. (%) | Furanes | Pyranes | F/P |
|------------|----------|-----------|---------|---------|-----|
| R.T.       | 24       | 45        | 33      | 12      | 2.7 |
| 60 °C      | 24       | 63        | 47      | 16      | 2.9 |

**Table S4.** Oxidation of Linalool catalyzed by phase 1.

|                                                           | Phase 1                                             | Phase 2                                             |
|-----------------------------------------------------------|-----------------------------------------------------|-----------------------------------------------------|
| Empiric Formula                                           | C <sub>3</sub> NH <sub>9</sub> VOAsO <sub>4</sub> F | C <sub>3</sub> NH <sub>9</sub> VOAsO <sub>4</sub> F |
| Formula Weight (g/mol)                                    | 283.97                                              | 283.97                                              |
| Crystal System                                            | Monoclinic                                          | Monoclinic                                          |
| Space Group (N°15)                                        | C2/c                                                | C2/c                                                |
| a, Å                                                      | 21.065(2)                                           | 23.025(1)                                           |
| b, Å                                                      | 7.2717(4)                                           | 7.322(1)                                            |
| c, Å                                                      | 10.396(1)                                           | 10.344(1)                                           |
| β, °                                                      | 104.290(8)                                          | 109.250(6)                                          |
| V, Å <sup>3</sup>                                         | 1543.2(2)                                           | 1646.5(2)                                           |
| Z                                                         | 8                                                   | 8                                                   |
| ρ <sub>obs</sub> , ρ <sub>calc</sub> , gr/cm <sup>3</sup> | 2.40(3), 2.445                                      | 2.27(2), 2.29                                       |
| F(000)                                                    | 1112                                                | 1112                                                |
| μ, mm <sup>-1</sup>                                       | 5.54                                                | 5.19                                                |
| Radiation, λ(Mo Kα), Å                                    | 0.71073                                             | 0.71073                                             |
| Collected reflections                                     | 9114                                                | 7607                                                |
| Independent reflections                                   | 1698                                                | 2710                                                |
| Intervale h, k, l                                         | h±27, k± 9, l±11                                    | -33<h<30, k± 10, l±15                               |
| Completeness                                              | θ=26, 0.966                                         | θ=32.46, 0.913<br>θ=26, 0.997                       |
| R (int)                                                   | 0.05                                                | 0.05                                                |
| R [ $>2\sigma(I)$ ]                                       | R1=0.0405 R2=0.0854                                 | R1=0.0387 R2=0.0836                                 |
| R [All data]                                              | R1=0.0640                                           | R1=0.0781                                           |
|                                                           | wR2=0.0898                                          | wR2=0.0889                                          |
| Δρ <sub>max</sub> y Δρ <sub>min</sub> , e.Å <sup>-3</sup> | 1.266, -0.980                                       | 1.779, -0.694                                       |
| G. O. F                                                   | 0.947                                               | 0.859                                               |

**Table S5.-** Crystal data, details of data collection, and structure refinement for (C<sub>6</sub>N<sub>2</sub>H<sub>16</sub>)<sub>0.5</sub>[(VO)(HAsO<sub>4</sub>)F] **1** and **2**

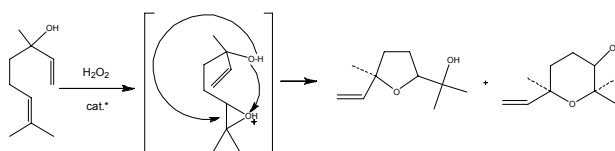

**Fig. S1.-** Schematically representation of linalool oxidation.

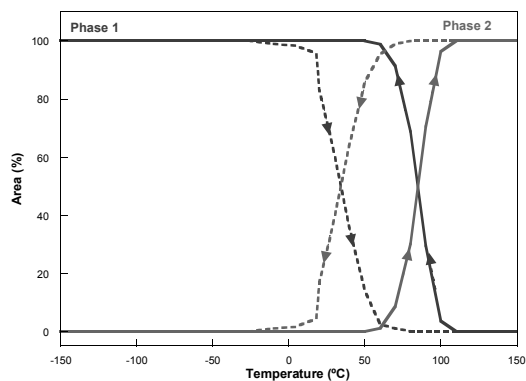

**Fig. S2.-** Stability diagram of **1** and **2**, as a function of the integrated area of the (200) reflection.

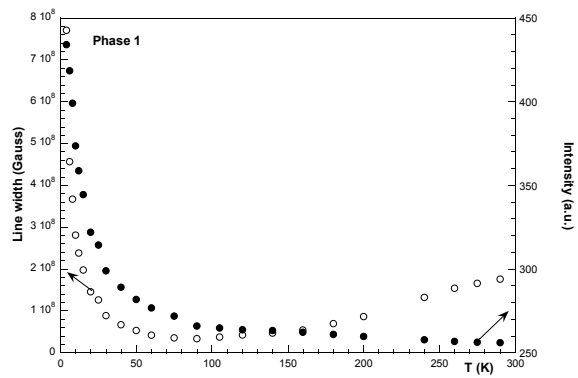

Fig. S3.- Thermal evolution of the line-width and the intensity of the ESR signals for 1.
